# Supplementary material for: Arab and German Phenotypic Variations of Skeletal Class II Malocclusion
Source: Research Square preprint supplement (doi:10.21203/rs.3.rs-6892435/v1), 2025-08-19

**Supplementary Table 1.**

| Dimension/Group   | Parameter             | Unit | Definition                                                                                                                                                        |
|-------------------|-----------------------|------|-------------------------------------------------------------------------------------------------------------------------------------------------------------------|
| Vertical Analysis | NL/ML<br>(anatomic)   | °    | The angle between the NL and ML                                                                                                                                   |
| Vertical Analysis | SNL/ML<br>(anatomic)  | °    | The inclination of the mandible (mandibular inclination) relative to the nasion-sella line (anterior skull base, SNL)                                             |
| Vertical Analysis | NL/NSL                | °    | The angle between Sella-Nasion-line (NSL = SN) and nasal line (Spa-Spp)                                                                                           |
| Vertical Analysis | PFH/AFH               | %    | The ratio between posterior (SGo) and anterior (NMe) facial height                                                                                                |
| Vertical Analysis | Gonial Angle          | °    | The angle between ML and line GoAr at Gonion                                                                                                                      |
| Vertical Analysis | Facial axis           | °    | The angle between the lines NBa and PtGN'                                                                                                                         |
| Sagittal Analysis | Angle SNA             | °    | The angle between Sella, Nasion, and point A                                                                                                                      |
| Sagittal Analysis | Angle SNB             | °    | The angle between Sella, Nasion, and point B                                                                                                                      |
| Sagittal Analysis | ANB                   | °    | The angle between Nasion, point A, and point B                                                                                                                    |
| Sagittal Analysis | ANB( indl.)           | °    | $ANB_{ind} = (-35.16 + 0.4 \cdot SNA + 0.2 \cdot ML-NSL)$ according to Panagiotidis and Witt                                                                      |
| Sagittal Analysis | SN-Ba                 | °    | Central saddle angle. It describes the extent of the skull base flexion                                                                                           |
| Sagittal Analysis | SNPg                  | °    | The angle between Sella, Nasion and Pogonion                                                                                                                      |
| Sagittal Analysis | S-N                   | mm   | The S-N line represents the anterior cranial base. It is constructed by connecting the points sella turcica and the Nasion                                        |
| Sagittal Analysis | Go-Me                 | mm   | The mandibular plane as a line connecting the points gonion and menton                                                                                            |
| Sagittal Analysis | Wits                  | mm   | measures the extent to which the jaws are related to each other anteroposteriorly.                                                                                |
| Growth Analysis   | ML-NSL                | °    | The angle formed between the ML and NSL lines                                                                                                                     |
| Dental Analysis   | (+1/NL)               | °    | The angle between upper incisors' tooth axis and line NL                                                                                                          |
| Dental Analysis   | (+1/SN)               | °    | The angle between upper incisors' tooth axis and line SN                                                                                                          |
| Dental Analysis   | +1/NA                 | °    | The angle between upper incisors' tooth axis and line NA                                                                                                          |
| Dental Analysis   | +1/NA                 | mm   | the upper central incisor to N-A reading in millimeters provides information on the relative forward or backward positioning of the incisor teeth to the N-A line |
| Dental Analysis   | -1/ML<br>(anatomic)   | °    | The relative anteroposterior angulation of the lower incisor teeth is determined by relating the most protruding incisor tooth to the mandibular plane (ML)       |
| Dental Analysis   | (-1/NB)               | °    | The lower central incisor to N-B reading in degrees indicates the relative axial inclination of these teeth                                                       |
| Dental Analysis   | (-1/NB)               | mm   | The lower incisor to NB line measurement in millimeters shows the relative forward or backward positioning of these teeth to the N-B line                         |
| Dental Analysis   | Interincisal<br>angle | °    | the inter-incisal angle relates the relative position of the upper incisor to that of the lower incisor                                                           |

Supplementary Figure 1.

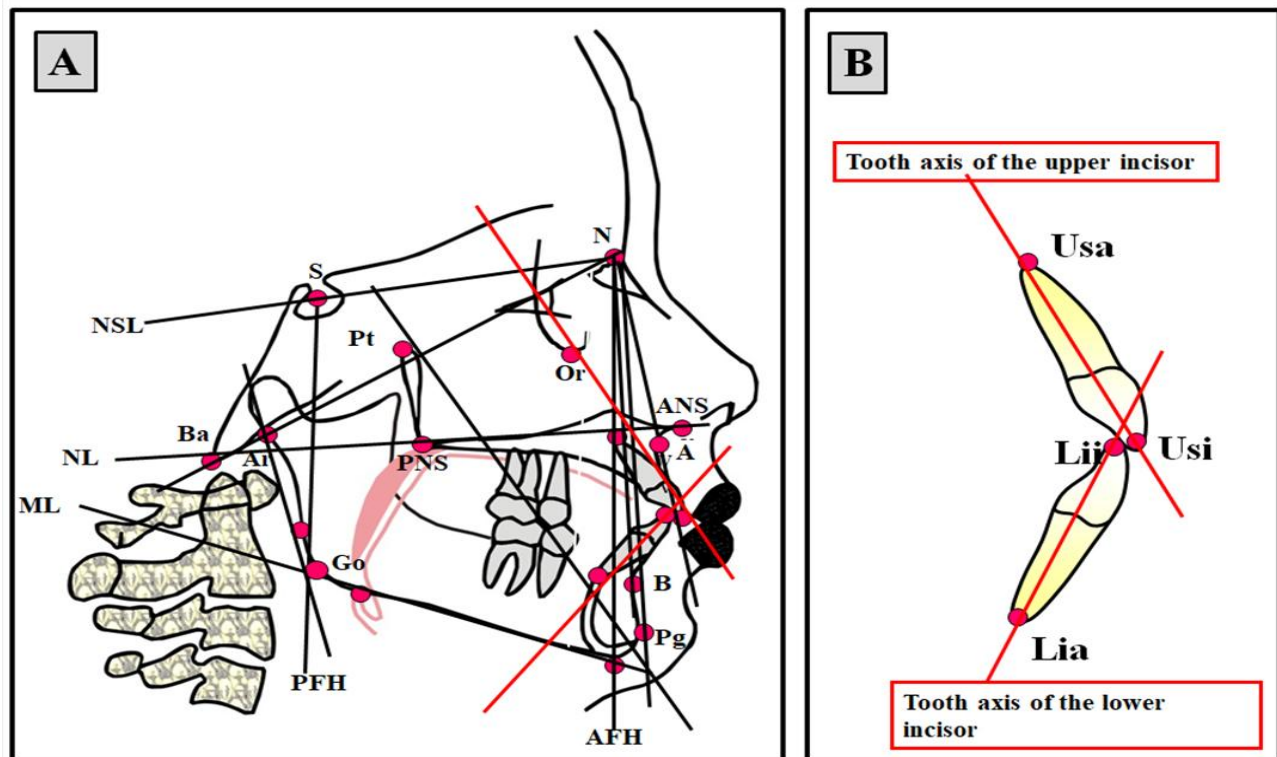

Supplement: Supplementary file 1 [file 7736e178680991eb828a1454.pdf]
